# Supplementary material
Source: PubMed Central journal article supplement (PMC3123867)

# Supplemental Figure S5

A

6 weeks

12 weeks

Dorsal Lateral Ventral Anterior

Dorsal Lateral Ventral Anterior

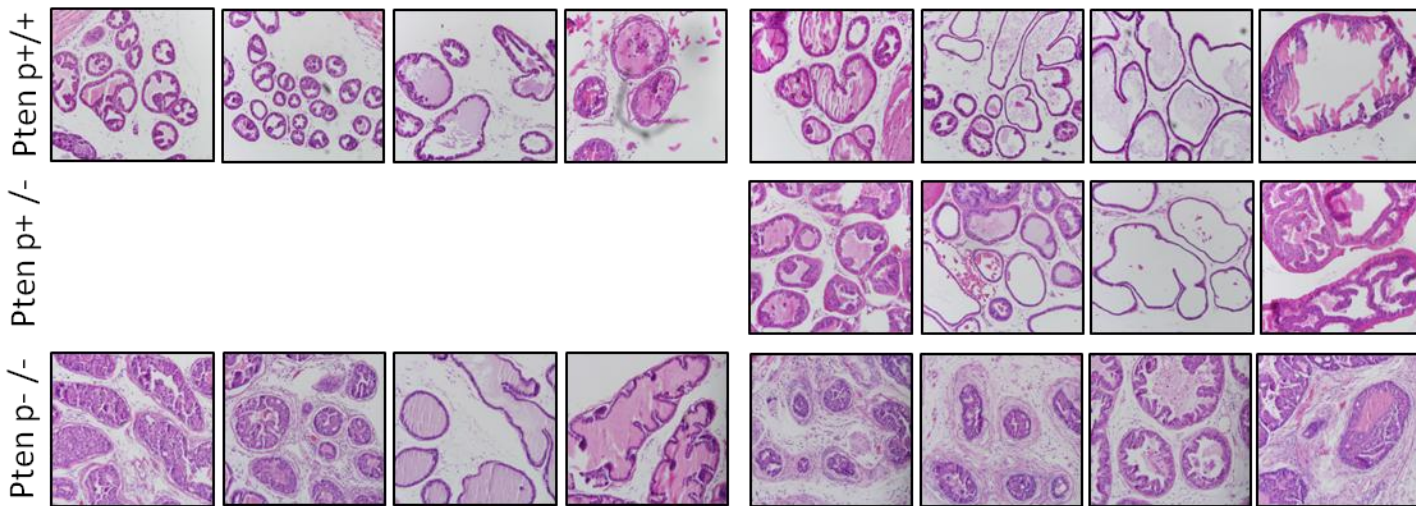

25 weeks

52 weeks

Dorsal Lateral Ventral Anterior

Dorsal Lateral Ventral Anterior

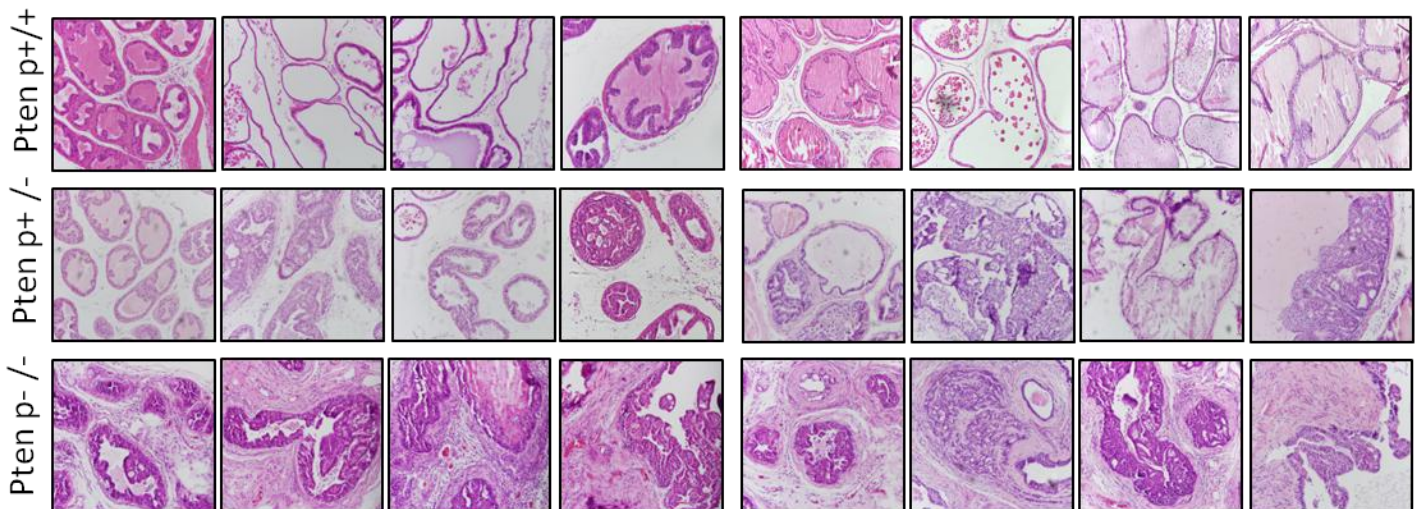

Supplement: mmc5.pdf [file mmc5.pdf]
