# Supplementary material
Source: PubMed Central journal article supplement (PMC3123867)

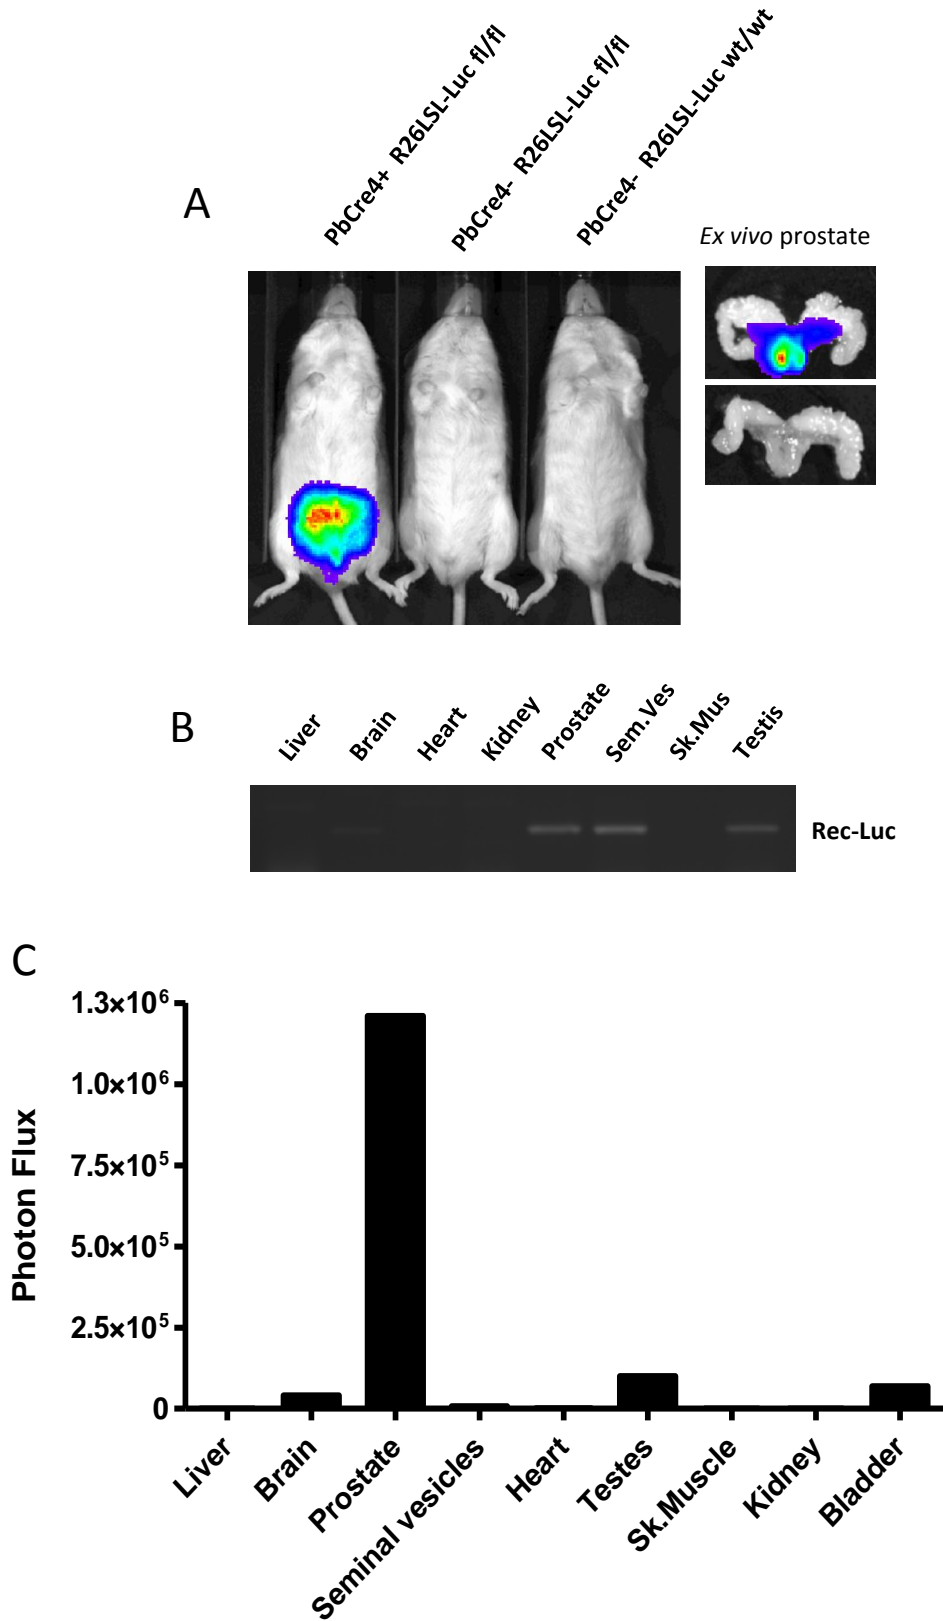

Supplement: mmc1.pdf [file mmc1.pdf]

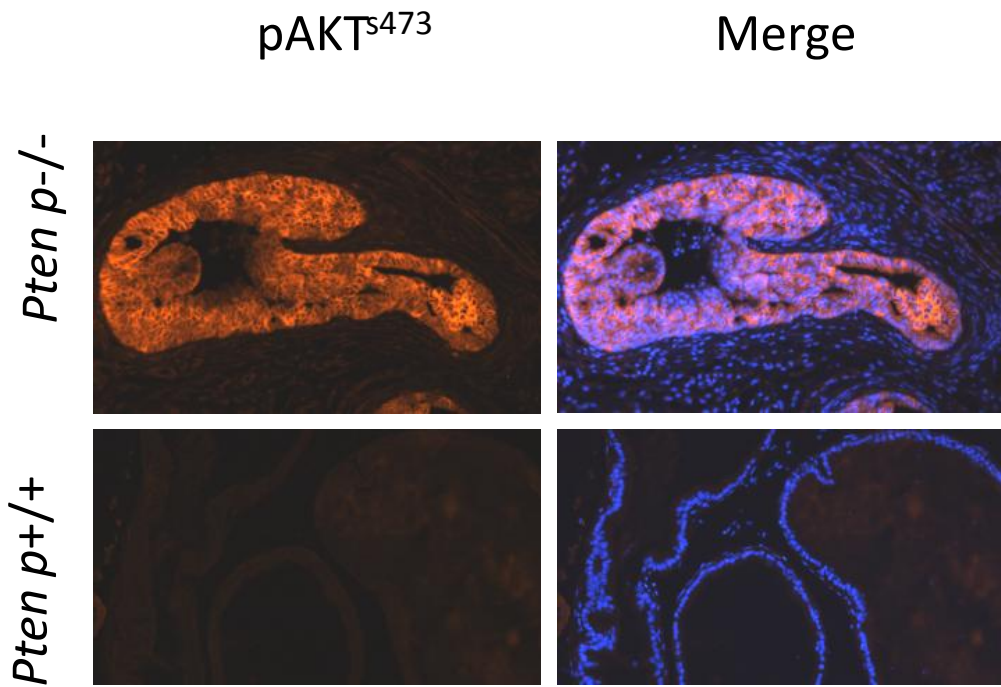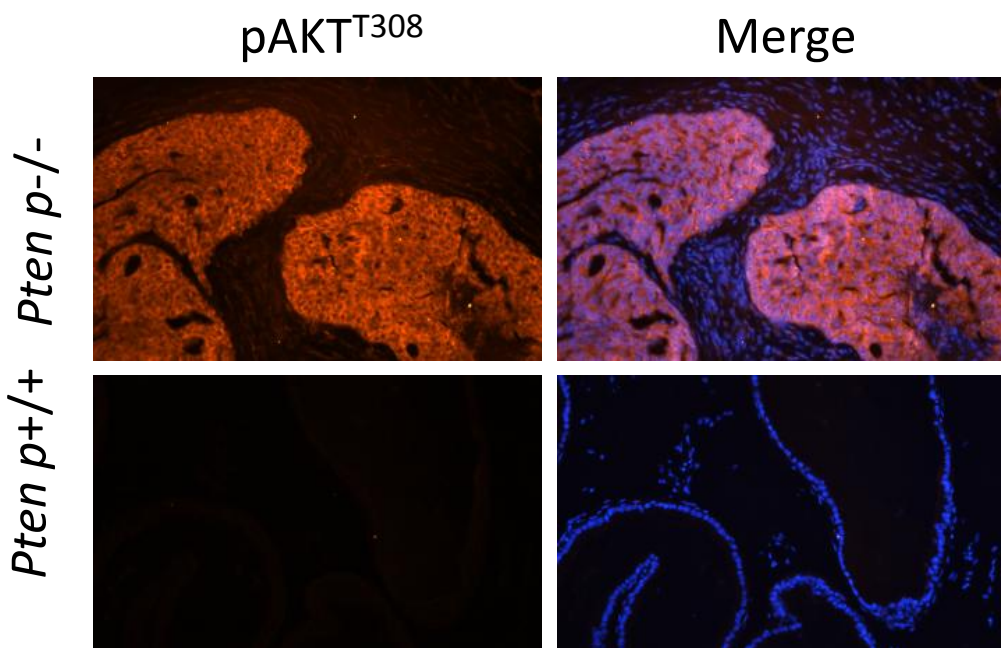

Supplement: mmc2.pdf [file mmc2.pdf]

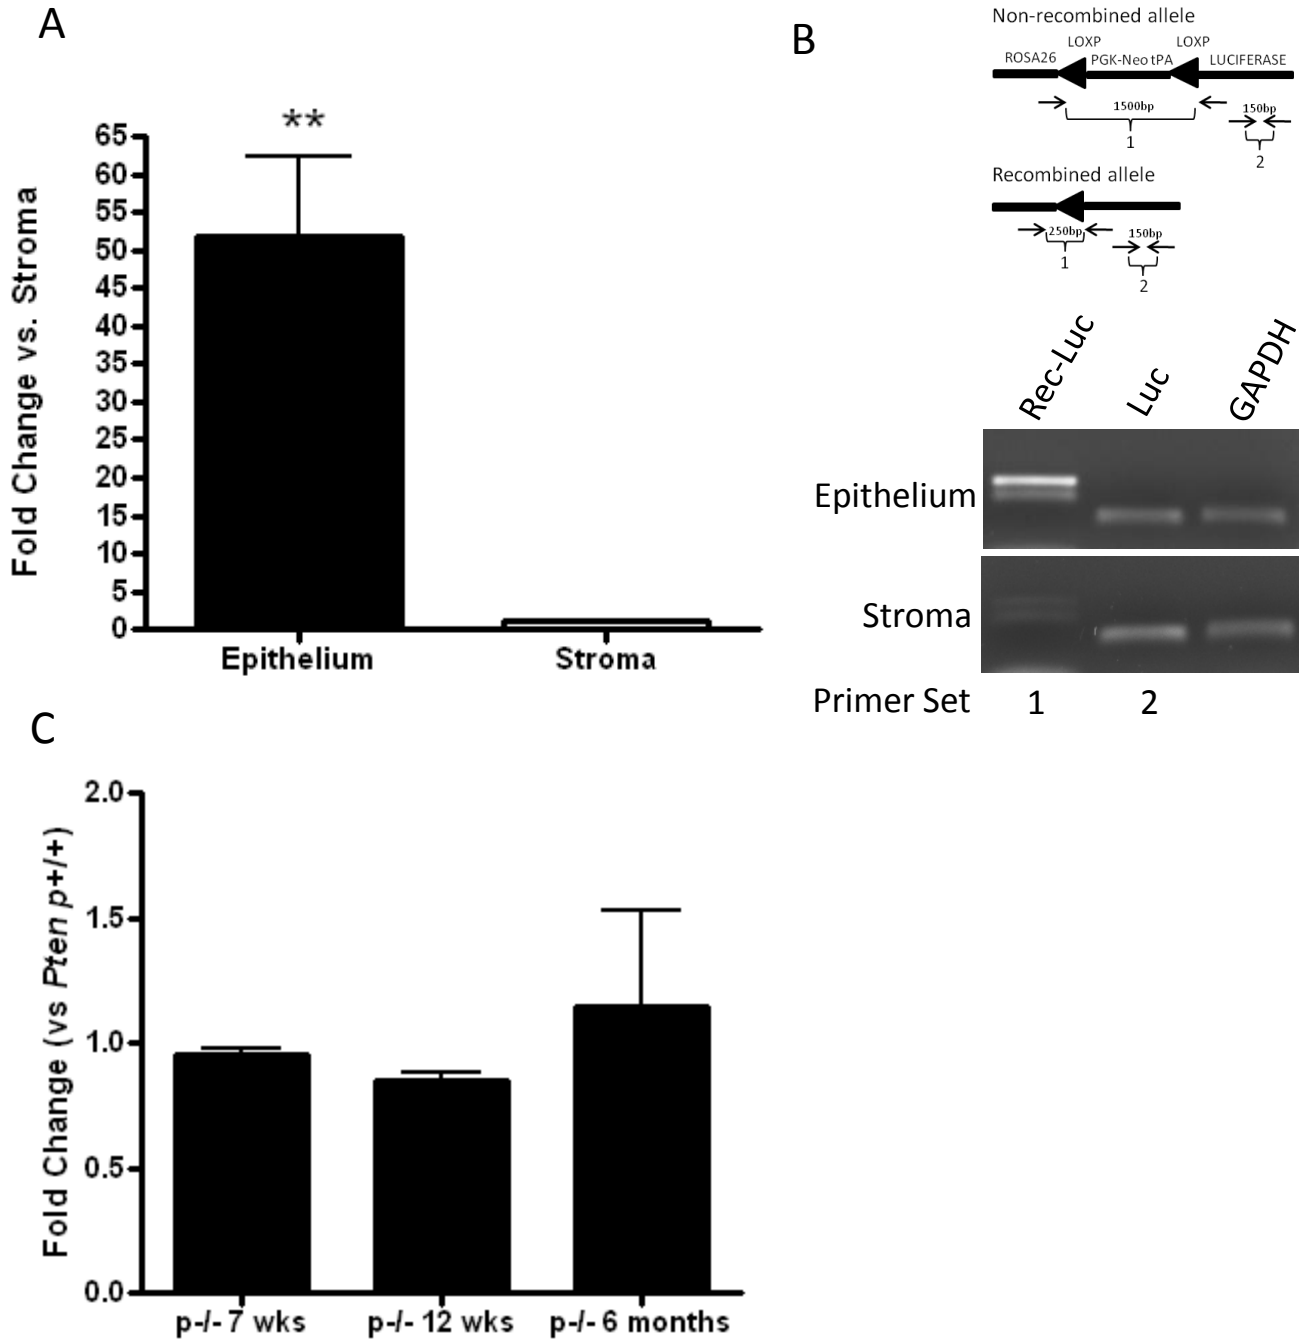

Supplement: mmc3.pdf [file mmc3.pdf]

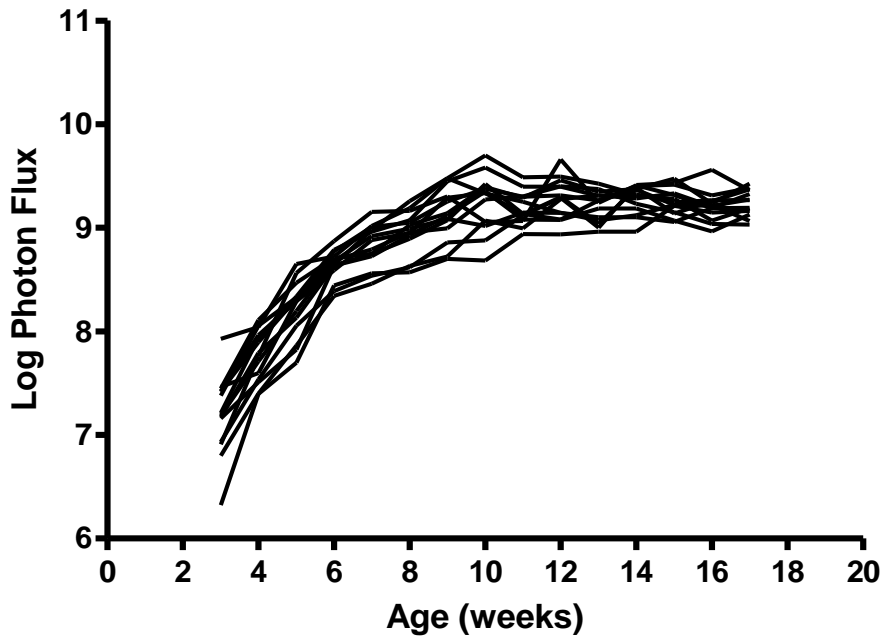

Supplement: mmc4.pdf [file mmc4.pdf]

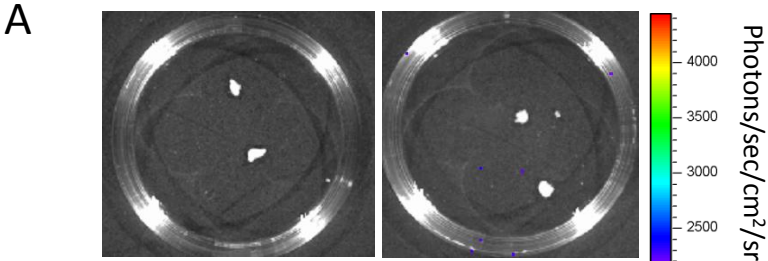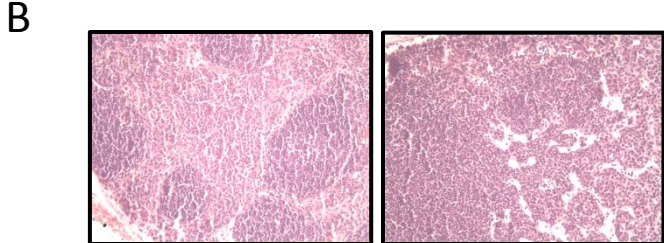

Supplement: mmc6.pdf [file mmc6.pdf]

**A** Gated on FS/SS  
Showing CD45+ gate

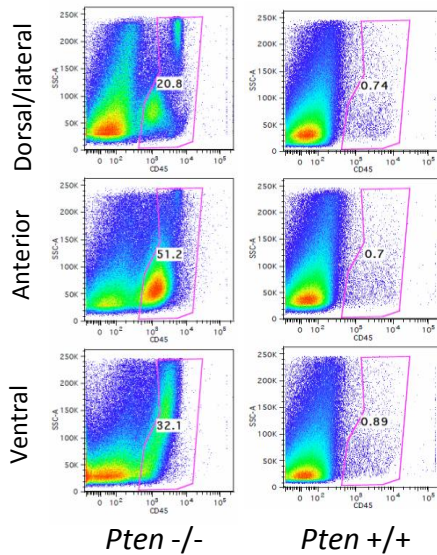

**B**

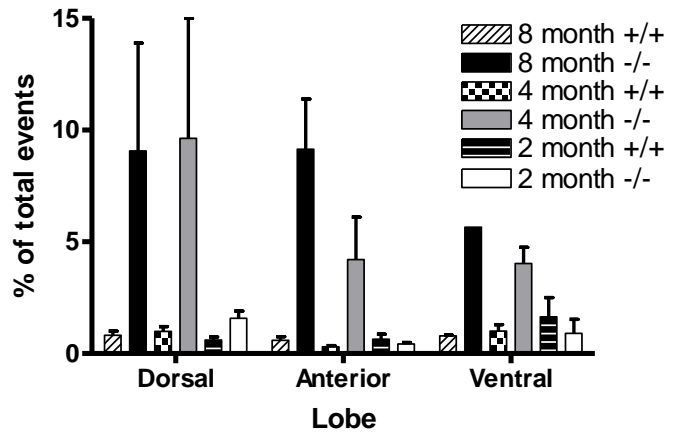

**C** Gated on CD45+  
Showing MDSC gate

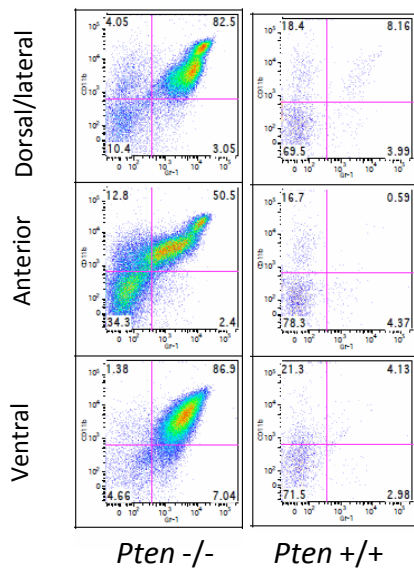

**D**

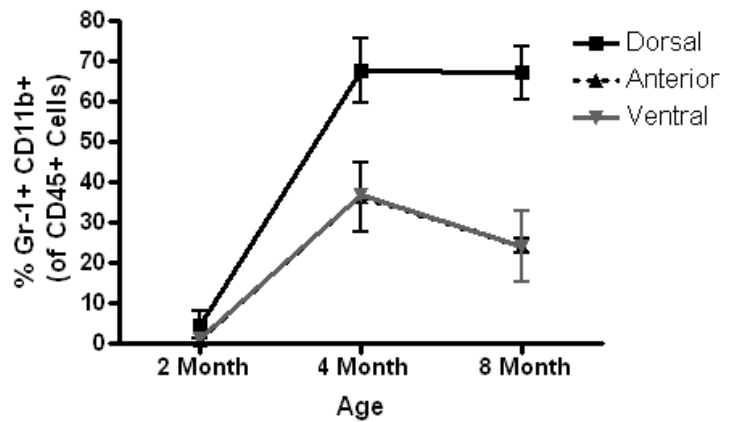

Supplement: mmc7.pdf [file mmc7.pdf]
